# Supplementary material for: Branched alkyl-chain engineering of chlorinated asymmetrical acceptors for improved organic photovoltaic performance
Source: Royal Society of Chemistry journal article supplement (doi:10.1039/d2ta05846d), 2022-01-01
Supplement: d2ta05846d1.pdf [file d2ta05846d1.pdf]

Supporting Information for

**Branched Alkyl-chain Engineering of Chlorinated Asymmetrical Acceptors for Improved  
Organic Photovoltaic Performance**

Dandan Li,<sup>a‡</sup> Gang Li,<sup>\*a‡</sup> Zhixiang Li,<sup>b</sup> Lingxian Meng,<sup>b</sup> Yan Xu,<sup>a</sup> Guanwei Cui,<sup>a</sup> Yunfei Bai,<sup>a</sup>  
Xiangjian Wan,<sup>\*a</sup> Yongsheng Chen<sup>\*a</sup> and Bo Tang<sup>\*a</sup>

<sup>a</sup> College of Chemistry, Chemical Engineering and Materials Science, Key Laboratory of Molecular and Nano Probes, Ministry of Education, Collaborative Innovation Center of Functionalized Probes for Chemical Imaging in Universities of Shandong, Institute of Materials and Clean Energy, Shandong Provincial Key Laboratory of Clean Production of Fine Chemicals, Shandong Normal University, Jinan 250014, China. E-mail: [ligang@sdnu.edu.cn](mailto:ligang@sdnu.edu.cn); [tangb@sdnu.edu.cn](mailto:tangb@sdnu.edu.cn)

<sup>b</sup> The Centre of Nanoscale Science and Technology and Key Laboratory of Functional Polymer Materials, Institute of Polymer Chemistry, College of Chemistry, Nankai University, Tianjin 300071, China E-mail: [xjwan@nankai.edu.cn](mailto:xjwan@nankai.edu.cn); [yschen99@nankai.edu.cn](mailto:yschen99@nankai.edu.cn)

<sup>‡</sup>These authors contributed equally to this work.

## Materials

All solvents and chemicals used were purchased from Energy Chemical, Aladdin, Innochem and SPAKE or other commercial resources and used as received. All reactions were heated by metal sand bath (WATTCAS, LAB-500, <http://www.wattcas.com>). Toluene and THF were distilled from sodium benzophenone under nitrogen. Anhydrous DMF was distilled from  $\text{CaH}_2$ . PM6 and IC-2Cl were purchased from Solarmer Materials Inc (Beijing).

## Instruments and Measurement

$^1\text{H}$  and  $^{13}\text{C}$  NMR spectra were recorded on a Bruker AVIII-400M (400 MHz and 100 MHz, respectively) spectrometer at room temperature.  $^1\text{H}$  and  $^{13}\text{C}$  NMR chemical shifts were determined relative to internal standard TMS at  $\delta$  0.0,  $\text{CDCl}_3$  ( $\delta$   $^1\text{H}$ , 7.26 ppm;  $\delta$   $^{13}\text{C}$ , 77.16 ppm). The spectroscopic solvents were purchased from Cambridge Isotope Laboratories. Chemical shifts ( $\delta$ ) are reported in ppm. The following abbreviations are used to explain the multiplicities: s = singlet, d = doublet, t = triplet, q = quartet, m = multiplet, br = broad.

Analytical thin layer chromatography (TLC) was performed on 0.25 mm silica gel 60 F254 plates and viewed by UV light (254 nm). Column chromatographic purification was performed using 100-200 or 200-300 mesh silica gel. Mass spectra were measured on a Bruker Maxis UHR-TOF MS spectrometer. UV-vis absorption spectra were performed with a Beijing Purkinje General Instrument Co. Ltd. TU-1901 spectrophotometer. All steady-state measurements were carried out using a quartz cuvette with a path length of 1 cm. Photoluminescence (PL) quenching experiments were recorded on an Edinburgh Instruments FLS1000 double-monochromator spectrophotometer. Thermogravimetric analysis (TGA) was carried out on a TA Instrument TA Q50 Thermogravimetric Analyzer at a heating rate of 10  $^\circ\text{C}$  /min up to 800  $^\circ\text{C}$ .

## Solar cell fabrication and characterization

Solar cells were fabricated in a conventional device configuration of ITO/PEDOT: PSS/Active layer/PNDIT-F<sub>3</sub>N/Ag. The ITO-coated glass substrates were cleaned by ultrasonic treatment in detergent, deionized water, acetone, and isopropyl alcohol under ultra-sonication for 15 minutes each and subsequently dried by a nitrogen blow. The glass substrates were treated by UV-Ozone for 15 min before use. PEDOT: PSS (Heraeus Clevios P VP A 4083) layer was spin-cast onto the ITO substrates at 4300 rpm for 30s. After baked at 150  $^\circ\text{C}$  for 20 minutes, the substrates were transferred into an argon-

filled glove box. The donor:acceptor blends with 1:1 ratio were dissolved in chlorobenzene (the concentration of blend solutions are 20 mg/mL for all blend films), and stirred overnight in a nitrogen-filled glove box. Subsequently, the blend solution was spin-coated to form the active layers with a thickness of 110 nm. Then the substrates were TA treatment at 100 °C for 5 min for all acceptors. A thin PNDIT-F<sub>3</sub>N layer (10 nm) and Ag layer (100 nm) were sequentially evaporated through a shadow mask under vacuum of 1.5×10<sup>-4</sup> Pa.

### **Space charge-limited current (SCLC) device fabrication**

The hole and electron mobility were measured using the space charge limited current (SCLC) method, employing a diode configuration of ITO/PEDOT:PSS/active layer/Ag for hole and glass/ITO/ZnO/active layer/Al for electron by taking the dark current density in the range of 0-8 V and fitting the results to a space charge limited form, where SCLC is described by:

$$J = \frac{9\epsilon_0\epsilon_r\mu_0(V - V_{bi})^2}{8L^3}$$

where  $J$  is the current density,  $L$  is the film thickness of the active layer,  $\mu$  is the hole or electron mobility,  $\epsilon_r$  is the relative dielectric constant of the transport medium,  $\epsilon_0$  is the permittivity of free space ( $8.85 \times 10^{-12}$  F m<sup>-1</sup>),  $V$  is the applied voltage to the device and  $V_{bi}$  is the built-in voltage due to the relative work function difference of the two electrodes.

### **Film and Device Characterization**

UV-vis spectra were obtained with a Cary 5000 Spectrophotometers. The optimal blend thickness was about 110 nm, measured on a Bruker Dektak XT stylus profilometer. The current density-voltage (J-V) curves of photovoltaic devices were obtained by a Keithley 2400 source-measure unit. The photocurrent was measured under AM 1.5G illumination at 100 mW cm<sup>-2</sup> irradiation using a SAN-EI XES-70S1 solar simulator, calibrated with a standard Si solar cell. The external quantum efficiency (EQE) spectrum was measured using a QE-R Solar Cell Spectral Response Measurement System (Enli Technology Co., Ltd., Taiwan).

### **Electrochemical Characterization.**

Cyclic voltammogram (CV) was performed with a CHI 660C electrochemical workstation at a scan rate of 100 mV/s. The highest occupied molecular orbital (HOMO) and lowest unoccupied molecular orbital (LUMO) energy levels were calculated from the onset oxidation potential and the onset reduction potential, using the equation  $E_{\text{HOMO}} = -(4.80 + E_{\text{ox}}^{\text{onset}})$ ,  $E_{\text{LUMO}} = -(4.80 + E_{\text{re}}^{\text{onset}})$ .

### Atomic force microscope (AFM) Characterization

AFM measurements were performed by using a Scanning Probe Microscope-Dimension 3100 in tapping mode. All films were coated on ITO glass substrates.

### Grazing incidence wide angle X-ray scattering (GIWAXS) Characterization

The grazing incidence wide angle X-ray scattering (GIWAXS) were conducted at Beijing Synchrotron Radiation Facility (BSRF), Institute of High Energy Physics. All samples were prepared on ZnO-coated Si substrates using the same preparation conditions as for devices. All samples were irradiated at a fixed X-ray incident angle of  $0.2^\circ$  with an exposure time of 1200s.

### Synthetic procedures

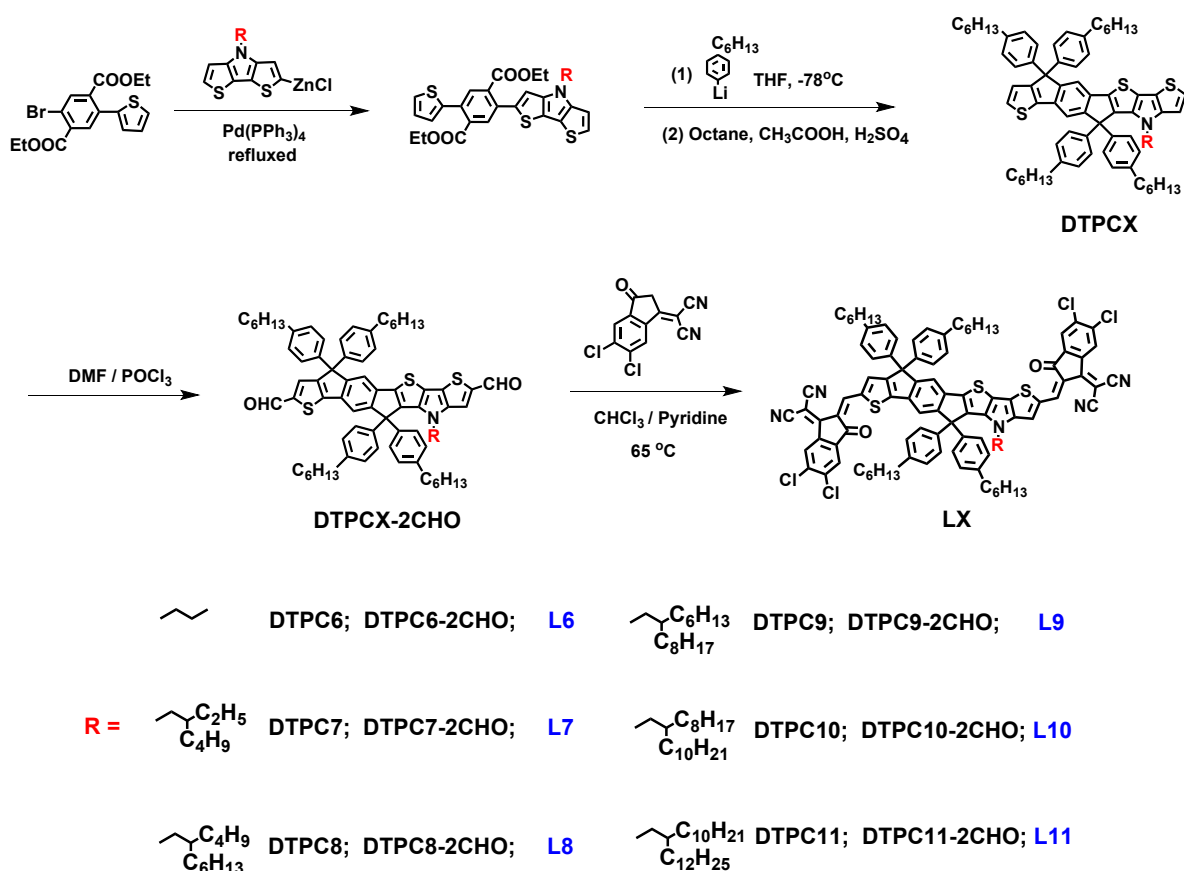

**Scheme S1.** The synthetic route of six acceptors.

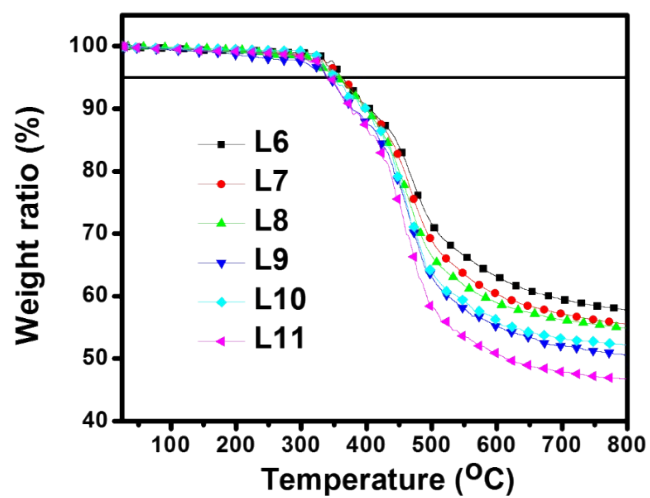

**Figure S1.** TGA profiles of six acceptors.

**Table S1.** Basic properties of L6-L11.

| Acceptor | $\lambda_{\text{max}}^{\text{a)}$<br>(nm) | $\epsilon_{\text{max}}^{\text{a)}$<br>(M <sup>-1</sup> cm <sup>-1</sup> ) | $\lambda_{\text{onset}}^{\text{a)}$<br>(nm) | $\lambda_{\text{max}}^{\text{film b)}$<br>(nm) | $\lambda_{\text{onset}}^{\text{film b)}$<br>(nm) | $E_{\text{g}}^{\text{opt}}$<br>(eV) | HOMO<br>(eV) | LUMO<br>(eV) |
|----------|-------------------------------------------|---------------------------------------------------------------------------|---------------------------------------------|------------------------------------------------|--------------------------------------------------|-------------------------------------|--------------|--------------|
| L6       | 748                                       | $2.75 \times 10^5$                                                        | 791                                         | 804                                            | 865                                              | 1.43                                | -5.56        | -3.97        |
| L7       | 748                                       | $2.51 \times 10^5$                                                        | 791                                         | 806                                            | 866                                              | 1.43                                | -5.54        | -3.92        |
| L8       | 748                                       | $3.13 \times 10^5$                                                        | 791                                         | 805                                            | 859                                              | 1.43                                | -5.61        | -3.92        |
| L9       | 748                                       | $2.04 \times 10^5$                                                        | 791                                         | 807                                            | 865                                              | 1.43                                | -5.63        | -3.91        |
| L10      | 748                                       | $2.33 \times 10^5$                                                        | 791                                         | 805                                            | 864                                              | 1.43                                | -5.65        | -3.93        |
| L11      | 748                                       | $2.28 \times 10^5$                                                        | 791                                         | 805                                            | 871                                              | 1.42                                | -5.67        | -3.92        |

a) In a chloroform solution. b) In a neat film.

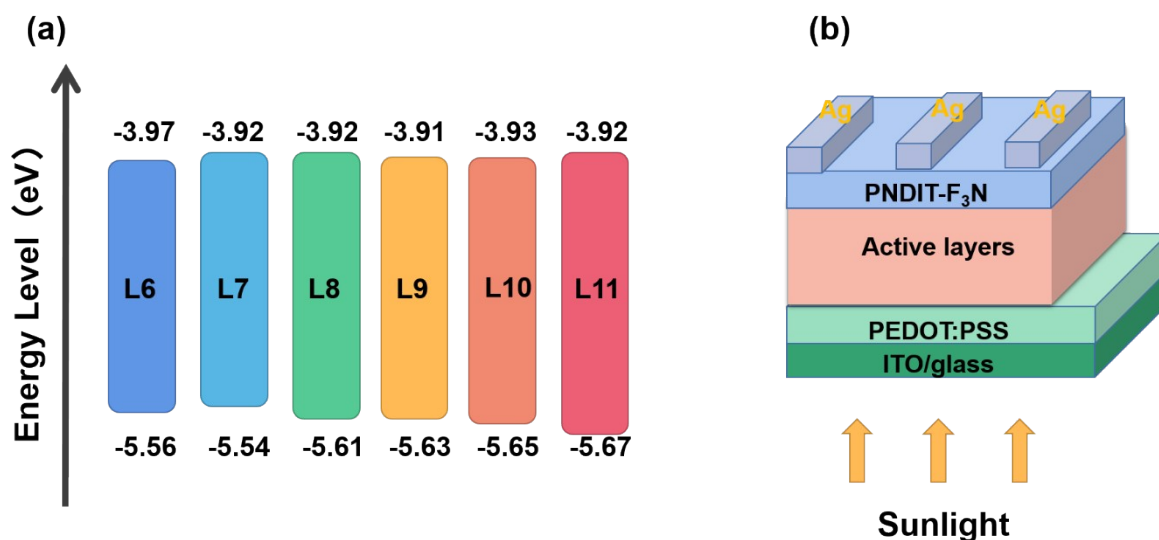

**Figure S2.** (a) Energy level diagrams for L6-L11. (b) The OSCs devices diagram.

**Table S2.** Photovoltaic parameters of the OSCs based on PM6:L8 with different D/A weight ratios under the illumination of AM1.5G (100 mA/cm<sup>2</sup>).

| D:A   | V <sub>oc</sub> (V) | FF    | J <sub>sc</sub> (mA/cm <sup>2</sup> ) | PCE (%) |
|-------|---------------------|-------|---------------------------------------|---------|
| 0.8:1 | 0.907               | 0.653 | 21.17                                 | 12.52   |
| 1:1   | 0.903               | 0.637 | 22.17                                 | 12.72   |
| 1:1.2 | 0.900               | 0.637 | 20.77                                 | 11.88   |
| 1:1.4 | 0.894               | 0.592 | 22.03                                 | 11.63   |

**Table S3.** Photovoltaic performance of the solar cells based on PM6:L8 (1:1, w/w) with different thermal annealing (TA) temperature under illumination of AM1.5G (100 mA/cm<sup>2</sup>).

| TA (°C) | V <sub>oc</sub> (V) | FF    | J <sub>sc</sub> (mA/cm <sup>2</sup> ) | PCE (%) |
|---------|---------------------|-------|---------------------------------------|---------|
| 80      | 0.896               | 0.659 | -22.00                                | 12.97   |
| 100     | 0.895               | 0.675 | -22.57                                | 13.62   |
| 120     | 0.887               | 0.662 | -22.35                                | 13.11   |
| 140     | 0.868               | 0.663 | -22.15                                | 12.88   |

**Table S4.** Photovoltaic performance of the solar cells based on PM6:L8 (1:1, w/w) with different amounts of DIO additive under illumination of AM1.5G (100 mA/cm<sup>2</sup>).

| DIO (%) | $V_{oc}$ (V) | $FF$  | $J_{sc}$ (mA/cm <sup>2</sup> ) | PCE (%) |
|---------|--------------|-------|--------------------------------|---------|
| 0.5     | 0.887        | 0.668 | -23.14                         | 13.71   |
| 0.7     | 0.881        | 0.705 | -23.59                         | 14.66   |
| 1       | 0.883        | 0.684 | -22.45                         | 13.67   |

**Table S5.** Photovoltaic performance of the solar cells based on PM6:L8 (1:1, w/w) with different donor concentration under illumination of AM 1.5 G, 100 mW cm<sup>-2</sup>.

| Conc. (mg/ml) | $V_{oc}$ (V) | $FF$  | $J_{sc}$ (mA/cm <sup>2</sup> ) | PCE (%) |
|---------------|--------------|-------|--------------------------------|---------|
| 9             | 0.867        | 0.738 | 21.47                          | 13.83   |
| 10            | 0.864        | 0.754 | 23.63                          | 15.40   |
| 11            | 0.871        | 0.731 | 21.23                          | 13.62   |

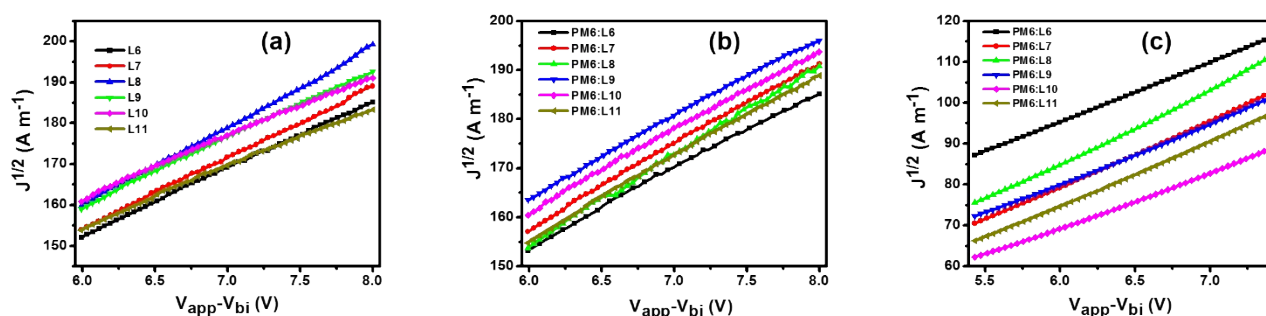

**Figure S3.** Charge carrier mobility of (a) L6-L11, electron mobility; (b) L6-L11 blended with PM6, electron mobility; (c) L6-L11 blended with PM6, hole mobility.

**Table S6.** Charge mobilities measured by SCLC method.

| Samples | Electron mobility                                  | Hole mobility                                      | $\mu_e/\mu_h$ |
|---------|----------------------------------------------------|----------------------------------------------------|---------------|
|         | (cm <sup>2</sup> V <sup>-1</sup> s <sup>-1</sup> ) | (cm <sup>2</sup> V <sup>-1</sup> s <sup>-1</sup> ) |               |
| PM6: L6 | 1.11×10 <sup>-4</sup>                              | 0.892×10 <sup>-4</sup>                             | 1.24          |
| PM6: L7 | 1.21×10 <sup>-4</sup>                              | 1.06×10 <sup>-4</sup>                              | 1.14          |
| PM6: L8 | 1.41×10 <sup>-4</sup>                              | 1.38×10 <sup>-4</sup>                              | 1.02          |
| PM6: L9 | 1.16×10 <sup>-4</sup>                              | 1.01×10 <sup>-4</sup>                              | 1.15          |

|          |                        |                        |      |
|----------|------------------------|------------------------|------|
| PM6: L10 | $1.13 \times 10^{-4}$  | $0.914 \times 10^{-4}$ | 1.23 |
| PM6: L11 | $1.20 \times 10^{-4}$  | $0.994 \times 10^{-4}$ | 1.21 |
| L6       | $1.14 \times 10^{-4}$  | -                      | -    |
| L7       | $1.25 \times 10^{-4}$  | -                      | -    |
| L8       | $1.54 \times 10^{-4}$  | -                      | -    |
| L9       | $1.16 \times 10^{-4}$  | -                      | -    |
| L10      | $0.931 \times 10^{-4}$ | -                      | -    |
| L11      | $0.902 \times 10^{-4}$ | -                      | -    |

**Table S7.** Key photovoltaic parameters calculated from the  $J_{ph}$ - $V_{eff}$  curves of L6-L11 blended with PM6 based devices.

| Samples  | $J_{sat}$<br>(mA cm <sup>-2</sup> ) | $J_{ph}^b$<br>(mA cm <sup>-2</sup> ) | $J_{ph}^c$<br>(mA cm <sup>-2</sup> ) | $J_{ph}^b / J_{sat}$<br>(%) | $J_{ph}^c / J_{sat}$<br>(%) |
|----------|-------------------------------------|--------------------------------------|--------------------------------------|-----------------------------|-----------------------------|
| PM6: L6  | 26.651                              | 24.948                               | 21.595                               | 93.61                       | 81.03                       |
| PM6: L7  | 25.896                              | 25.004                               | 21.833                               | 96.56                       | 84.31                       |
| PM6: L8  | 25.696                              | 24.862                               | 21.668                               | 98.18                       | 84.40                       |
| PM6: L9  | 27.196                              | 26.415                               | 22.744                               | 97.13                       | 83.63                       |
| PM6: L10 | 24.987                              | 24.533                               | 21.09                                | 96.75                       | 83.50                       |
| PM6: L11 | 24.684                              | 23.686                               | 20.116                               | 95.96                       | 81.49                       |

<sup>a</sup>The  $J_{ph}$  under condition of  $V_{eff} = 3.0$  V; <sup>b</sup>The  $J_{ph}$  under short circuit condition; <sup>c</sup>The  $J_{ph}$  under maximum power output condition.

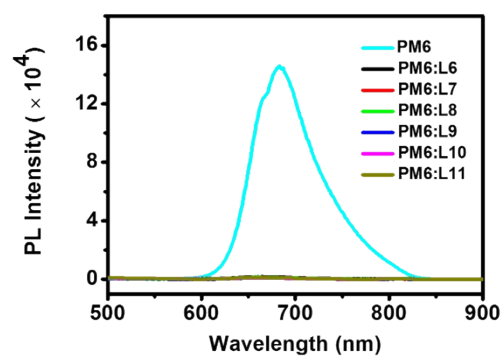

**Figure S4.** Fluorescence spectrum of donor PM6 quenching by acceptors L6-L11.



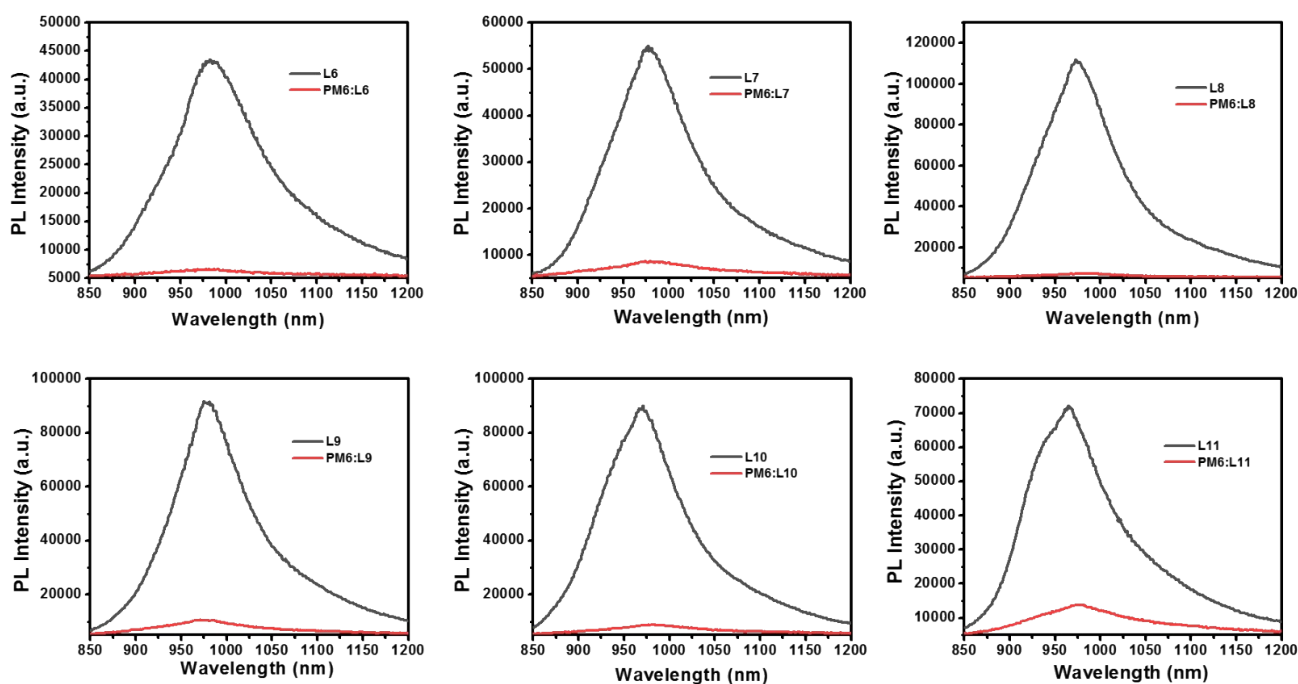

**Figure S5.** Fluorescence quenching profiles of acceptors L6-L11 when blended with donor PM6.

**Table S8.** Fluorescence quenching efficiency of PM6 and six acceptors.

| D:A     | Fluorescence quenching<br>efficiency of PM6 (%) | Fluorescence quenching<br>efficiency of acceptor (%) |
|---------|-------------------------------------------------|------------------------------------------------------|
| PM6:L6  | 98.76                                           | 85.15                                                |
| PM6:L7  | 99.07                                           | 85.10                                                |
| PM6:L8  | 99.31                                           | 93.39                                                |
| PM6:L9  | 99.24                                           | 88.44                                                |
| PM6:L10 | 99.22                                           | 90.24                                                |
| PM6:L11 | 99.08                                           | 82.00                                                |

**Table S9.** Contact angles, surface tensions ( $\gamma$ ) and interaction parameters ( $\chi$ ).

| Surface | $\theta_{\text{water}}(^{\circ})$ | $\theta_{\text{EG}}(^{\circ})$ | $\gamma$ (mN m <sup>-1</sup> ) | $\chi^{\text{D-A}}$ |
|---------|-----------------------------------|--------------------------------|--------------------------------|---------------------|
| PM6     | 105.32                            | 86.4                           | 38.46                          | -                   |
| L6      | 106.08                            | 84.62                          | 39.40                          | 0.006               |
| L7      | 96.49                             | 81.05                          | 48.28                          | 0.558               |
| L8      | 98.87                             | 74.16                          | 49.50                          | 0.695               |

|            |        |       |       |       |
|------------|--------|-------|-------|-------|
| <b>L9</b>  | 104.56 | 80.98 | 43.39 | 0.149 |
| <b>L10</b> | 104.07 | 82.27 | 43.10 | 0.132 |
| <b>L11</b> | 104.12 | 81.71 | 42.66 | 0.109 |

---

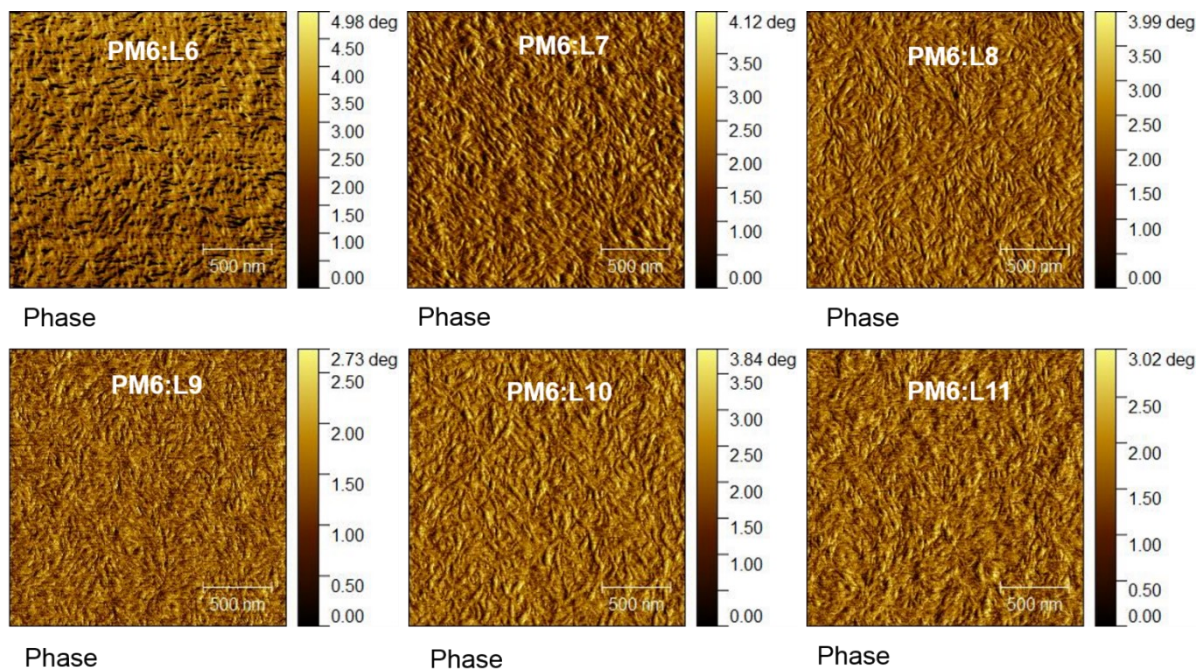

**Figure S6.** The phase profiles of L6-L11 blended with PM6.

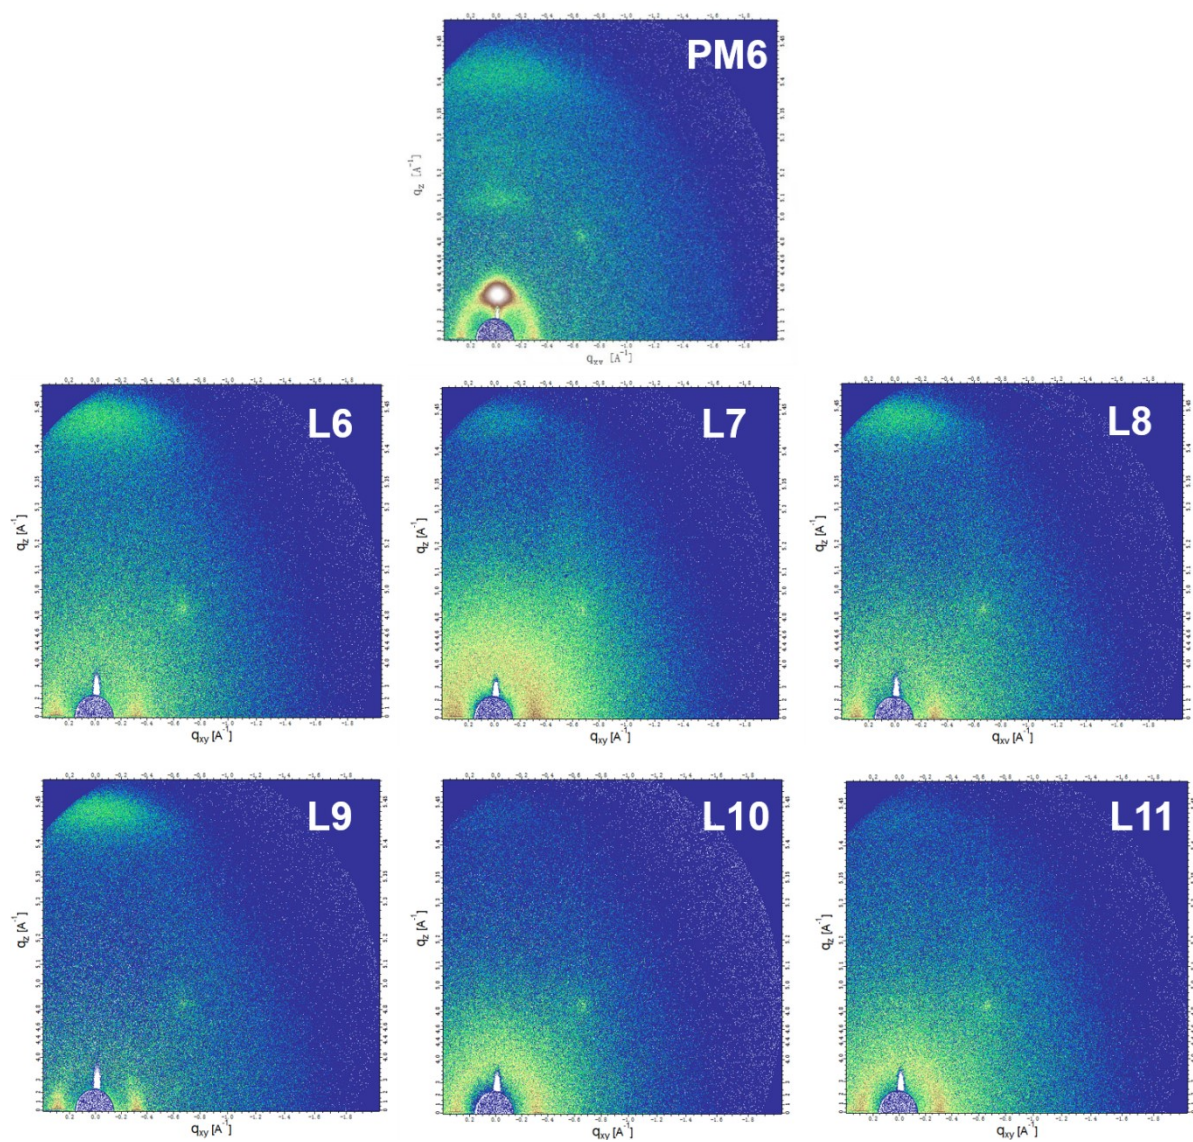

**Figure S7.** Two-dimensional GIWAXS patterns of pure PM6 and acceptor films under optimal conditions.

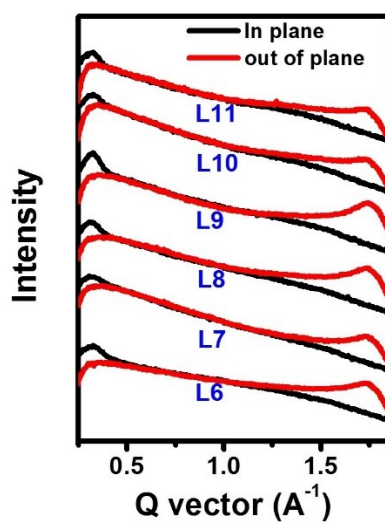

**Figure S8.** GIWAXS 1D line-cut profiles of L6-L11 neat films.

**Table S10.** The diffraction vector (q) values of diffraction peaks and crystal correlation length (CCL) in neat and blend films.

| Film    | q                       | d-spacing <sup>a</sup>  | CCL <sup>b</sup>        | q                       | d-spacing <sup>a</sup>  | CCL <sup>b</sup>        |
|---------|-------------------------|-------------------------|-------------------------|-------------------------|-------------------------|-------------------------|
|         | (010, Å <sup>-1</sup> ) | (010, Å <sup>-1</sup> ) | (010, Å <sup>-1</sup> ) | (100, Å <sup>-1</sup> ) | (100, Å <sup>-1</sup> ) | (100, Å <sup>-1</sup> ) |
| PM6:L6  | 1.725                   | 3.642                   | 40.392                  | 0.311                   | 20.20                   | 94.247                  |
| PM6:L7  | 1.725                   | 3.642                   | 41.888                  | 0.310                   | 20.27                   | 115.40                  |
| PM6:L8  | 1.716                   | 3.661                   | 42.200                  | 0.311                   | 20.20                   | 117.81                  |
| PM6:L9  | 1.711                   | 3.672                   | 38.732                  | 0.308                   | 20.40                   | 134.64                  |
| PM6:L10 | 1.721                   | 3.650                   | 40.977                  | 0.303                   | 20.74                   | 161.56                  |
| PM6:L11 | 1.707                   | 3.681                   | 41.560                  | 0.301                   | 20.87                   | 171.36                  |
| PM6     | 1.64                    | 3.83                    | 22.35                   | 0.298                   | 21.08                   | 87.00                   |
| L6      | 1.743                   | 3.604                   | 57.119                  | 0.319                   | 19.70                   | 76.420                  |
| L7      | 1.727                   | 3.638                   | 67.319                  | 0.32                    | 19.63                   | 53.347                  |
| L8      | 1.738                   | 3.615                   | 68.131                  | 0.313                   | 20.07                   | 54.373                  |
| L9      | 1.743                   | 3.604                   | 63.537                  | 0.321                   | 19.57                   | 68.131                  |
| L10     | 1.722                   | 3.649                   | 85.680                  | 0.323                   | 19.45                   | 61.466                  |
| L11     | 1.727                   | 3.638                   | 94.247                  | 0.314                   | 20.01                   | 50.944                  |

a) Calculated from the equation: d-spacing =  $2\pi/q$ . b) Obtained from the Scherrer equation:  $CCL = 2 \pi K / FWHM$ , where FWHM is the full-width at half-maximum and K is a shape factor (K = 0.9 here).

## Synthetic Details

**Synthesis of compound L6:** To a 100 ml round bottom flask, compound D6 (120 mg, 0.1 mmol), 5,6-dichloro-1,1-dicyanomethylene-3-indanone (IC-2Cl) (105.6 mg, 0.403 mmol), chloroform (30 ml) were added under argon protection and stirred for a while when pyridine (1 ml) was added. The mixture was kept stirring at 65 °C for 24 hours. After removal of chloroform of reaction mixture under reduced pressure, 100 ml methanol was added and the precipitate was collected by filtration. The residue was purified by column chromatography on silica gel using a mixture solvent as eluent (petroleum ether/dichloromethane, v/v = 1/1) to give a dark solid (98 mg, 59%).

**<sup>1</sup>H NMR (400 MHz, CDCl<sub>3</sub>):** δ 8.87 (s, 1H), 8.83 (s, 1H), 8.75 (s, 1H), 8.66 (s, 1H), 7.90-7.85 (d, 2H), 7.70-7.69 (d, 2H), 7.51 (s, 1H), 7.32-7.30 (m, 5H), 7.16-7.10 (m, 12H), 3.81-3.77 (d, 2H), 2.61-2.56 (q,

8H), 1.62-1.56 (m, 8H), 1.36-1.27 (br, 24H), 1.14-1.06 (m, 3H), 0.89-0.85 (br, 10H), 0.69 (t, 3H).

**<sup>13</sup>C NMR (100 MHz, CDCl<sub>3</sub>):** δ 186.13, 185.90, 161.30, 158.46, 158.17, 157.96, 156.61, 150.93, 147.60, 142.82, 142.40, 140.95, 140.56, 140.22, 139.64, 139.33, 139.16, 138.96, 138.78, 138.69, 138.61, 136.88, 136.74, 136.01, 135.42, 128.80, 128.76, 128.46, 127.71, 126.97, 126.61, 125.09, 124.77, 120.84, 120.43, 118.89, 117.61, 115.09, 114.89, 114.30, 67.24, 62.93, 62.64, 48.41, 35.56, 35.53, 32.26, 31.71, 31.68, 31.30, 29.10, 22.59, 22.57, 19.87, 14.09, 13.51.

**MALDI-TOF:** C<sub>98</sub>H<sub>87</sub>Cl<sub>4</sub>N<sub>5</sub>O<sub>2</sub>S<sub>3</sub> (M<sup>+</sup>), calcd, 1604.4780, found, 1604.4765.

**Synthesis of compound L7:** Compound L7 (TPIC-4Cl) was synthesized according to our published paper.<sup>[S1]</sup>

**Synthesis of compound L8:** The synthesis route of L8 is similar to the synthesis of L6 by replacing compound D6 with compound D8. The mixture was purified by column chromatography on silica gel with petroleum ether/dichloromethane (3:2, v/v) as an eluent to give a dark solid (130.0 mg, 78%).

**<sup>1</sup>H NMR (400 MHz, CDCl<sub>3</sub>):** δ 8.87 (s, 1H), 8.80 (s, 1H), 8.74 (s, 1H), 8.66 (s, 1H), 7.89-7.86 (d, 2H), 7.68-7.67 (d, 2H), 7.50 (s, 1H), 7.32-7.29 (m, 5H), 7.15-7.10 (m, 12H), 3.69-3.67 (d, 2H), 2.61-2.56 (q, 8H), 1.63-1.56 (m, 8H), 1.35-1.25 (br, 28H), 1.10-0.99 (m, 5H), 0.89-0.63 (br, 26H).

**<sup>13</sup>C NMR (100 MHz, CDCl<sub>3</sub>):** δ 186.12, 185.85, 161.35, 158.83, 158.47, 158.15, 157.93, 156.55, 151.21, 148.68, 142.81, 142.39, 140.93, 140.50, 140.22, 139.64, 139.32, 139.15, 138.96, 138.81, 138.72, 138.67, 138.60, 136.93, 136.89, 136.58, 136.01, 135.43, 128.83, 128.75, 127.70, 126.96, 126.60, 125.08, 124.77, 120.80, 120.43, 118.86, 117.51, 115.02, 114.90, 114.30, 69.39, 67.37, 62.91, 62.88, 53.22, 37.62, 35.55, 31.70, 31.68, 31.37, 31.31, 30.80, 30.54, 29.71, 29.57, 29.13, 29.10, 28.83, 26.61, 22.94, 22.59, 14.09, 13.95.

**MALDI-TOF:** C<sub>106</sub>H<sub>103</sub>Cl<sub>4</sub>N<sub>5</sub>O<sub>2</sub>S<sub>3</sub> (M<sup>+</sup>), calcd, 1716.6032, found, 1716.6032.

**Synthesis of compound L9:** The synthesis route of L9 is similar to the synthesis of L6 by replacing compound D6 with compound D9. The mixture was purified by column chromatography on silica gel with petroleum ether/dichloromethane (3:2, v/v) as an eluent to give a dark solid (134 mg, 75.5%).

**<sup>1</sup>H NMR (400 MHz, CDCl<sub>3</sub>):** δ 8.87 (s, 1H), 8.81 (s, 1H), 8.74 (s, 1H), 8.66 (s, 1H), 7.89-7.86 (d, 2H), 7.68-7.67 (d, 2H), 7.50 (s, 1H), 7.31-7.29 (m, 5H), 7.14-7.09 (m, 12H), 3.68-3.66 (d, 2H), 2.61-2.56 (q, 8H), 1.61-1.57 (m, 8H), 1.34-1.25 (br, 34H), 1.13-1.10 (br, 9H), 0.89-0.83 (br, 21H), 0.63 (t, 3H).



**<sup>13</sup>C NMR (100 MHz, CDCl<sub>3</sub>):** δ 186.13, 161.34, 158.82, 158.16, 157.93, 156.55, 151.19, 148.66, 142.80, 142.40, 140.93, 140.49, 140.22, 139.64, 139.32, 138.97, 138.71, 138.68, 138.60, 136.93, 136.89, 136.58, 136.02, 135.43, 128.83, 128.75, 127.70, 126.96, 126.61, 125.09, 124.78, 120.81, 120.42, 114.30, 69.39, 67.36, 62.91, 62.87, 35.55, 31.90, 31.70, 31.68, 31.38, 31.31, 30.88, 30.82, 29.90, 29.71, 29.58, 29.44, 29.27, 29.15, 29.10, 26.65, 26.62, 22.69, 22.59, 14.12, 14.09.

**MALDI-TOF:** C<sub>110</sub>H<sub>111</sub>Cl<sub>4</sub>N<sub>5</sub>O<sub>2</sub>S<sub>3</sub> (M<sup>+</sup>), calcd, 1772.6658, found, 1772.6655.

**Synthesis of compound L10:** The synthesis route of L10 is similar to the synthesis of L6 by replacing compound D6 with compound D10. The mixture was purified by column chromatography on silica gel with petroleum ether/dichloromethane (3:2, v/v) as an eluent to give a dark solid (140 mg, 76.6%).

**<sup>1</sup>H NMR (400 MHz, CDCl<sub>3</sub>):** δ 8.87 (s, 1H), 8.80 (s, 1H), 8.74 (s, 1H), 8.66 (s, 1H), 7.89-7.86 (d, 2H), 7.68-7.67 (d, 2H), 7.50 (s, 1H), 7.31-7.29 (m, 5H), 7.14-7.09 (m, 12H), 3.68-3.66 (d, 2H), 2.61-2.56 (q, 8H), 1.61-1.58 (m, 8H), 1.35-1.17 (br, 41H), 1.12-1.10 (br, 10H), 0.89-0.84 (br, 21H), 0.64 (t, 3H).

**<sup>13</sup>C NMR (100 MHz, CDCl<sub>3</sub>):** δ 186.13, 185.83, 161.35, 158.82, 158.46, 158.16, 157.93, 156.56, 151.20, 148.66, 142.80, 142.39, 140.93, 140.50, 140.22, 139.64, 139.32, 139.16, 138.97, 138.79, 138.71, 138.67, 138.61, 136.91, 136.58, 136.02, 135.43, 128.83, 128.75, 127.70, 126.96, 126.60, 125.09, 124.77, 120.80, 120.43, 118.87, 117.51, 115.01, 114.89, 114.30, 69.39, 67.36, 62.92, 62.87, 37.61, 35.56, 31.94, 31.91, 31.71, 31.39, 31.31, 30.84, 29.91, 29.68, 29.65, 29.51, 29.44, 29.39, 29.28, 29.16, 29.10, 26.64, 22.70, 22.59, 14.12, 14.10, 1.02.

**MALDI-TOF:** C<sub>114</sub>H<sub>119</sub>Cl<sub>4</sub>N<sub>5</sub>O<sub>2</sub>S<sub>3</sub> (M<sup>+</sup>), calcd, 1828.7284, found, 1828.7285.

**Synthesis of compound L11:** The synthesis route of L11 is similar to the synthesis of L6 by replacing compound D6 with compound D11. The mixture was purified by column chromatography on silica gel with petroleum ether/dichloromethane (3:2, v/v) as an eluent to give a dark solid (137 mg, 72.8%).

**<sup>1</sup>H NMR (400 MHz, CDCl<sub>3</sub>):** δ 8.80 (s, 1H), 8.75 (s, 1H), 8.68 (s, 1H), 8.61 (s, 1H), 7.82-7.80 (d, 2H), 7.61-7.59 (d, 2H), 7.42 (s, 1H), 7.23-7.21 (m, 5H), 7.07-7.04 (m, 12H), 3.61-3.53 (d, 2H), 2.54-2.48 (q, 8H), 1.54-1.47 (m, 8H), 1.23-1.15 (br, 50H), 1.03-0.93 (br, 10H), 0.80-0.78 (br, 20H), 0.57-0.55 (m, 3H).

**<sup>13</sup>C NMR (100 MHz, CDCl<sub>3</sub>):** δ 186.13, 185.83, 161.32, 158.84, 158.51, 158.18, 157.98, 156.60, 151.16, 148.65, 142.82, 142.41, 140.95, 140.55, 140.24, 139.67, 139.34, 139.17, 139.01, 138.74, 138.61,

136.95, 136.60, 136.05, 135.44, 128.84, 128.76, 127.72, 126.99, 126.63, 125.10, 124.79, 120.86, 120.44, 118.87, 117.52, 115.01, 114.88, 114.31, 69.44, 67.42, 62.91, 53.28, 37.58, 35.56, 31.94, 31.71, 31.36, 31.29, 30.87, 29.91, 29.75, 29.70, 29.66, 29.51, 29.39, 29.15, 29.09, 26.64, 22.69, 22.58, 14.10, 14.07.

**MALDI-TOF:** C<sub>118</sub>H<sub>127</sub>Cl<sub>4</sub>N<sub>5</sub>O<sub>2</sub>S<sub>3</sub>(M<sup>+</sup>), calcd, 1884.7910, found, 1884.7901.

**Copy of characterization data.**

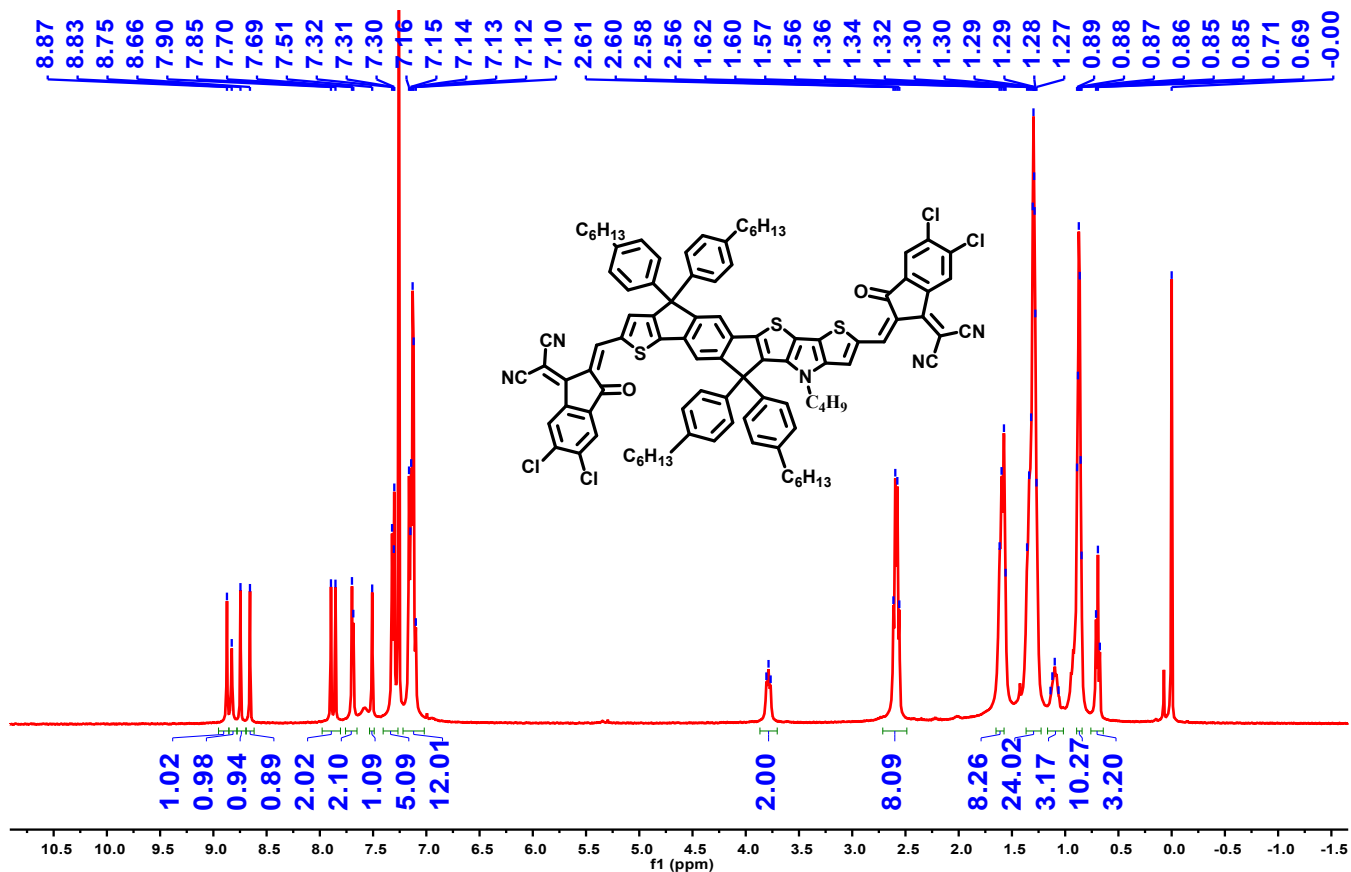

**Figure S9.** <sup>1</sup>H NMR spectrum of compound L6.









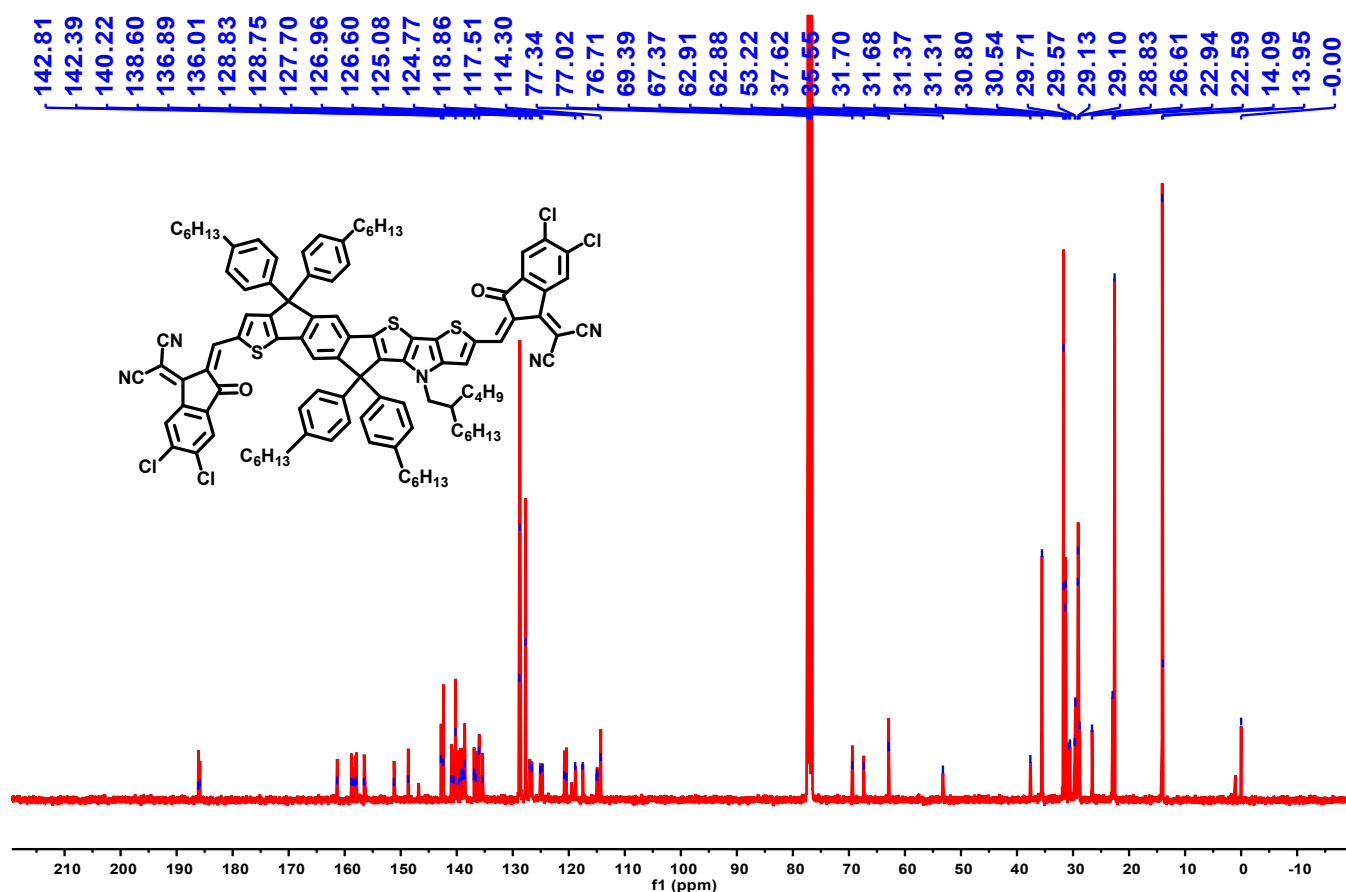

Figure S16.  $^{13}\text{C}$  NMR spectrum of compound L8.

|                              |                                               |                      |           |                                       |                          |
|------------------------------|-----------------------------------------------|----------------------|-----------|---------------------------------------|--------------------------|
| <b>Analysis Info</b>         |                                               |                      |           | Acquisition Date 6/17/2021 6:26:11 PM |                          |
| Analysis Name                | D:\Data\MALDI\2021\0617\LG-117_0_N12_000001.d |                      |           | Operator                              |                          |
| Method                       | MALDI_P_100-3000                              |                      |           | Instrument                            | solarix                  |
| Sample Name                  | MURU-N-ESI                                    |                      |           |                                       |                          |
| Comment                      |                                               |                      |           |                                       |                          |
| <b>Acquisition Parameter</b> |                                               |                      |           |                                       |                          |
| Acquisition Mode             | Single MS                                     | Acquired Scans       | 3         | Calibration Date                      | Tue Jun 1 04:57:02 2021  |
| Polarity                     | Positive                                      | No. of Cell Fills    | 1         | Data Acquisition Size                 | 2097152                  |
| Broadband Low Mass           | 202.1 m/z                                     | No. of Laser Shots   | 10        | Data Processing Size                  | 4194304                  |
| Broadband High Mass          | 2600.0 m/z                                    | Laser Power          | 49.0 lp   | Apodization                           | Sine-Bell Multiplication |
| Source Accumulation          | 0.001 sec                                     | Laser Shot Frequency | 0.020 sec |                                       |                          |
| Ion Accumulation Time        | 0.100 sec                                     |                      |           |                                       |                          |

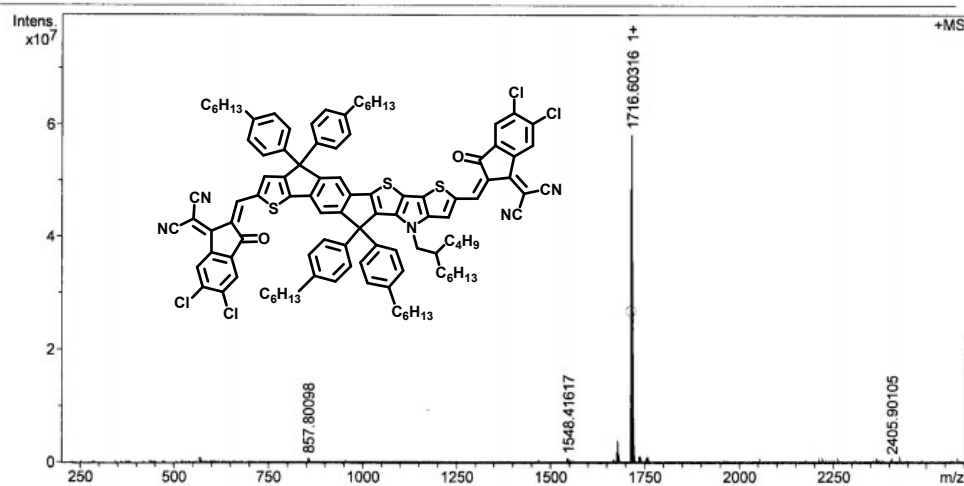

Figure S17. HRMS profile of compound L8.



# Analysis Info

Analysis Name D:\Data\MALDI\2021\0617\LG-118\_0\_N13\_000001.d  
 Method MALDI\_P\_100-3000  
 Sample Name MURU-N-ESI  
 Comment

Acquisition Date 6/17/2021 6:28:04 PM

Operator  
 Instrument solarix

## Acquisition Parameter

|                       |            |                      |           |                       |                          |
|-----------------------|------------|----------------------|-----------|-----------------------|--------------------------|
| Acquisition Mode      | Single MS  | Acquired Scans       | 2         | Calibration Date      | Tue Jun 1 04:57:02 2021  |
| Polarity              | Positive   | No. of Cell Fills    | 1         | Data Acquisition Size | 2097152                  |
| Broadband Low Mass    | 202.1 m/z  | No. of Laser Shots   | 10        | Data Processing Size  | 4194304                  |
| Broadband High Mass   | 2600.0 m/z | Laser Power          | 49.0 lp   | Apodization           | Sine-Bell Multiplication |
| Source Accumulation   | 0.001 sec  | Laser Shot Frequency | 0.020 sec |                       |                          |
| Ion Accumulation Time | 0.100 sec  |                      |           |                       |                          |

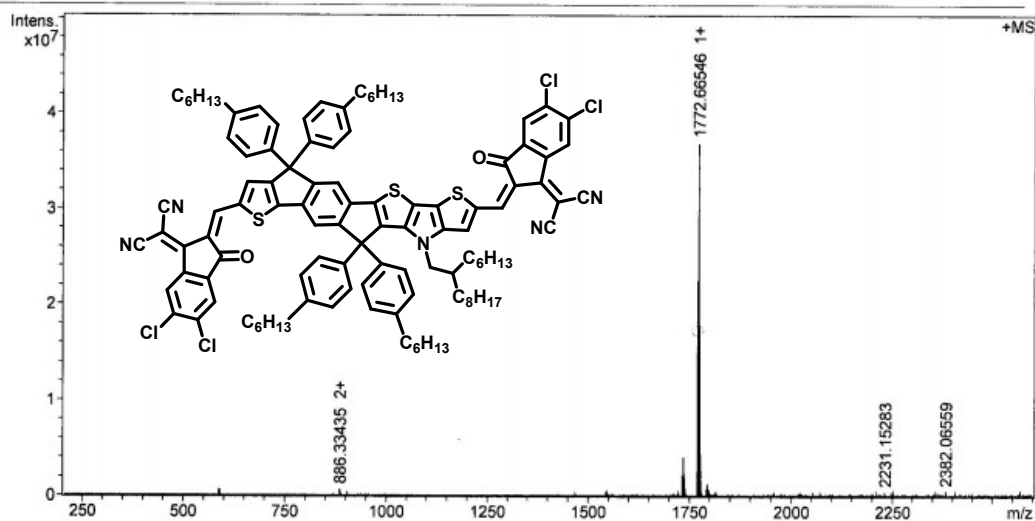

Figure S20. HRMS profile of compound L9.

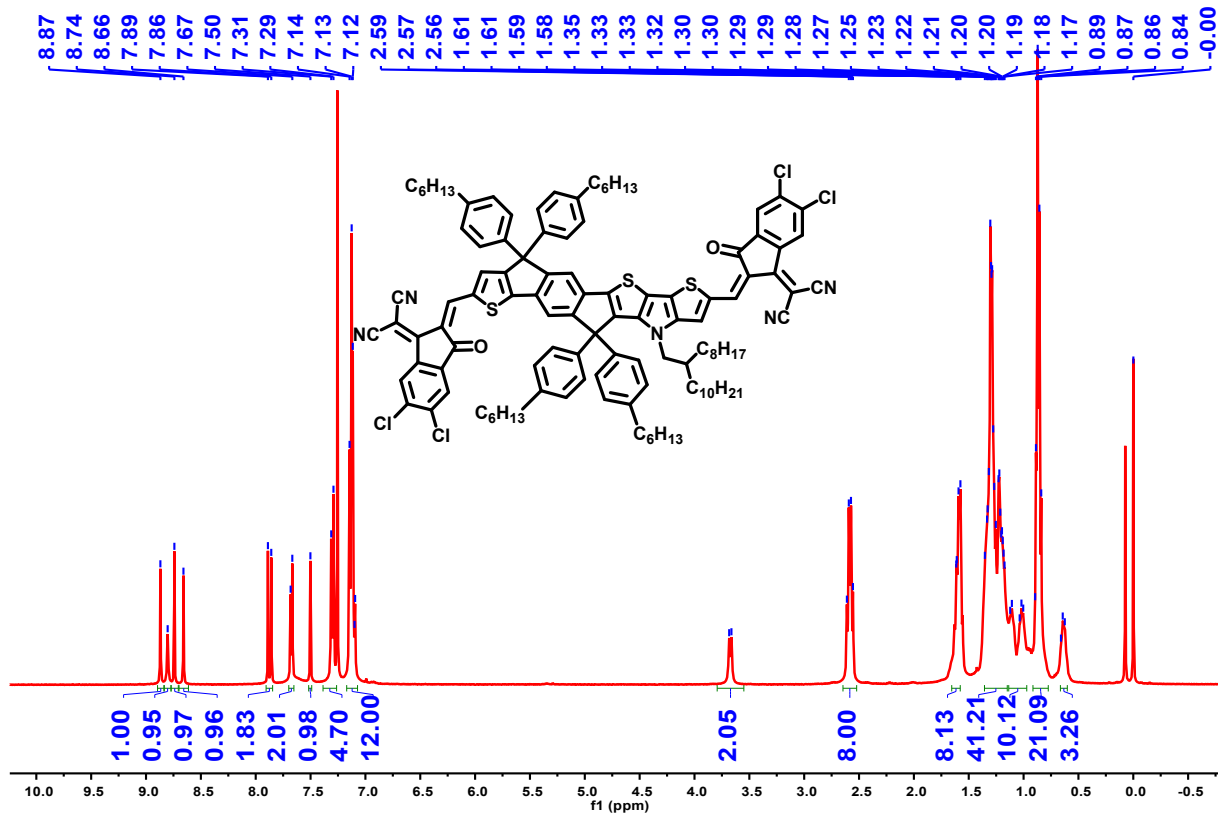

Figure S21. <sup>1</sup>H NMR spectrum of compound L10.

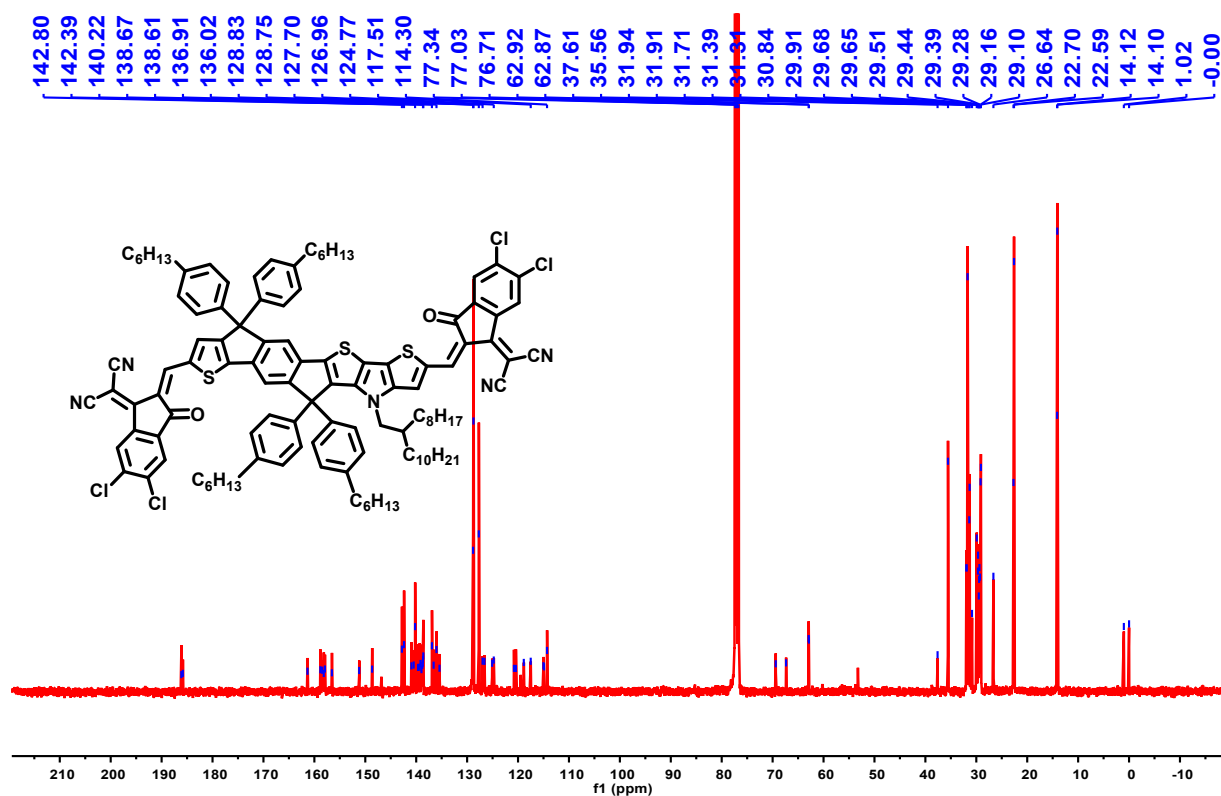

Figure S22.  $^{13}\text{C}$  NMR spectrum of compound L10.

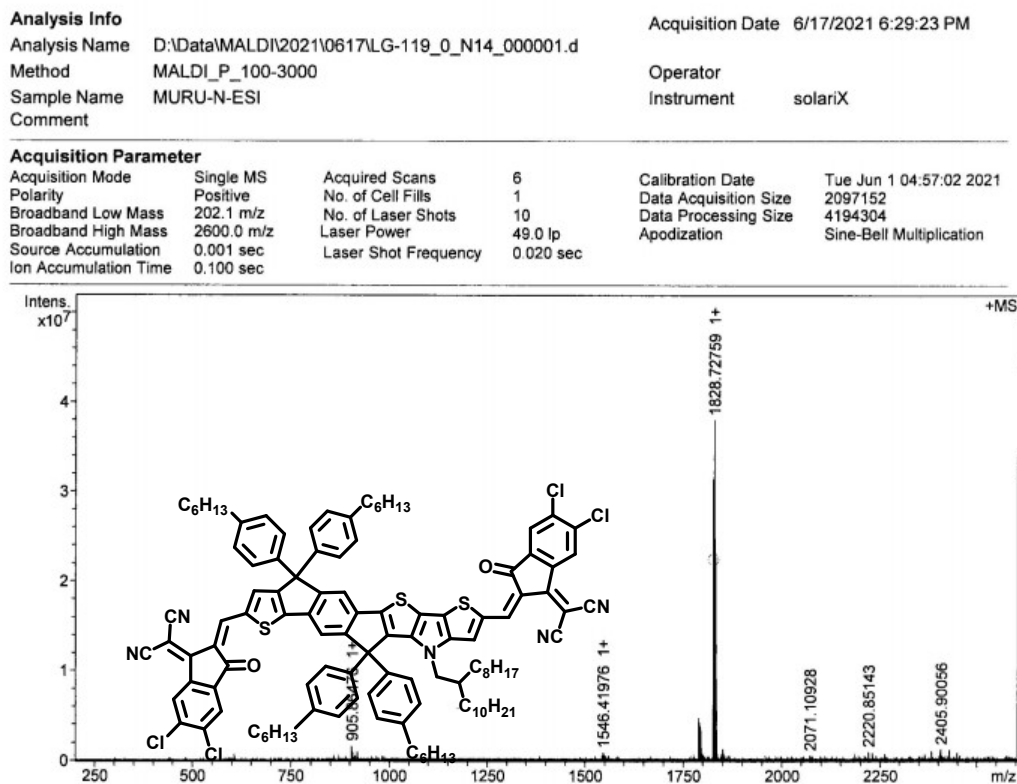

Figure S23. HRMS profile of compound L10.



**Analysis Info**

Analysis Name D:\Data\MALDI\2021\0617\LG-120\_0\_N15\_000001.d  
Method MALDI\_P\_100-3000  
Sample Name MURU-N-ESI  
Comment

Acquisition Date 6/17/2021 6:30:30 PM

Operator  
Instrument solariX

**Acquisition Parameter**

|                       |            |                      |           |                       |                          |
|-----------------------|------------|----------------------|-----------|-----------------------|--------------------------|
| Acquisition Mode      | Single MS  | Acquired Scans       | 4         | Calibration Date      | Tue Jun 1 04:57:02 2021  |
| Polarity              | Positive   | No. of Cell Fills    | 1         | Data Acquisition Size | 2097152                  |
| Broadband Low Mass    | 202.1 m/z  | No. of Laser Shots   | 10        | Data Processing Size  | 4194304                  |
| Broadband High Mass   | 2600.0 m/z | Laser Power          | 52.4 lp   | Apodization           | Sine-Bell Multiplication |
| Source Accumulation   | 0.001 sec  | Laser Shot Frequency | 0.020 sec |                       |                          |
| Ion Accumulation Time | 0.100 sec  |                      |           |                       |                          |

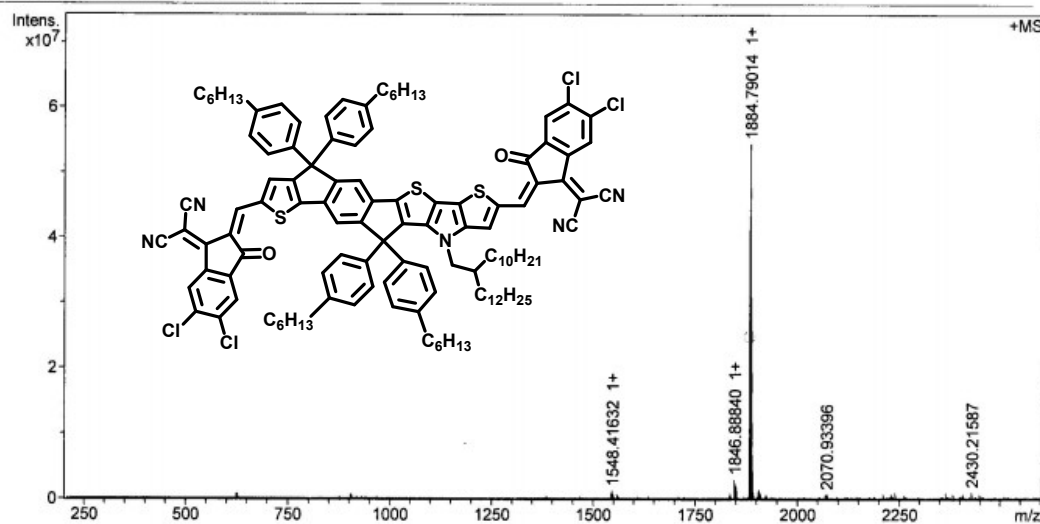

**Figure S26.** HRMS profile of compound **L11**.

**Reference:**

[S1]. G. Li, D. Li, R. Ma, T. Liu, Z. Luo, G. Cui, L. Tong, M. Zhang, Z. Wang, F. Liu, L. Xu, H. Yan, B. Tang, *J. Mater. Chem. A*. 2020, 8, 5927-5935.
